# Supplementary material for: Mechanism of H2S Oxidation by the Dissimilatory Perchlorate-Reducing Microorganism Azospira suillum PS
Source: PubMed Central journal article supplement (PMC5358917; doi:10.1128/mbio.02023-16), 2017-02-21
Supplement: mbo001173198sf1.pdf [file mbo001173198sf1.pdf]

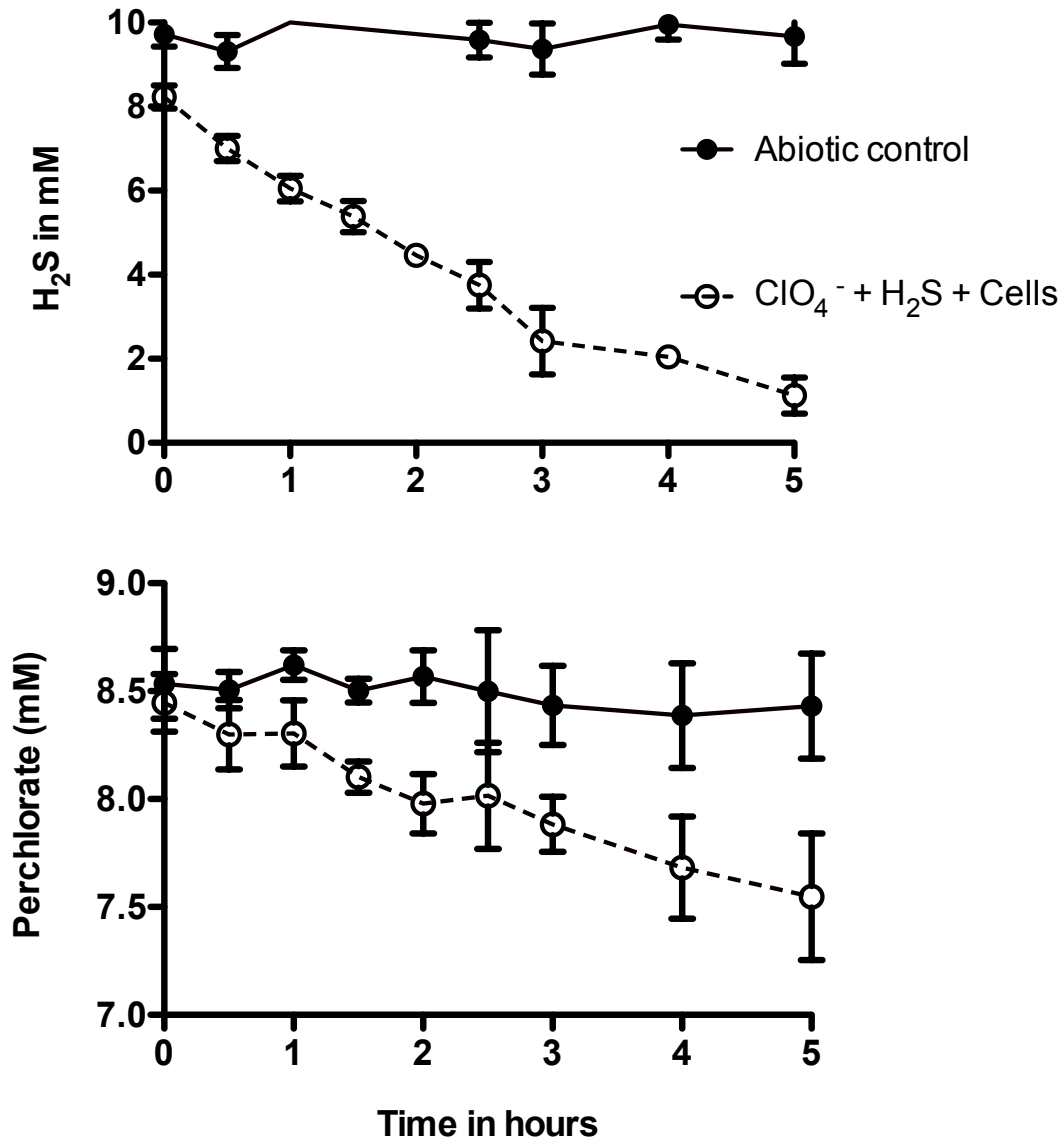

**Figure S1. H<sub>2</sub>S oxidation with concomitant perchlorate reduction.** PS cultures showing H<sub>2</sub>S oxidation (top panel) is coupled to perchlorate reduction (bottom panel) in absence of other electron donors.
