# Supplementary material for: Mechanism of H2S Oxidation by the Dissimilatory Perchlorate-Reducing Microorganism Azospira suillum PS
Source: PubMed Central journal article supplement (PMC5358917; doi:10.1128/mbio.02023-16), 2017-02-21
Supplement: mbo001173198sf2.pdf [file mbo001173198sf2.pdf]

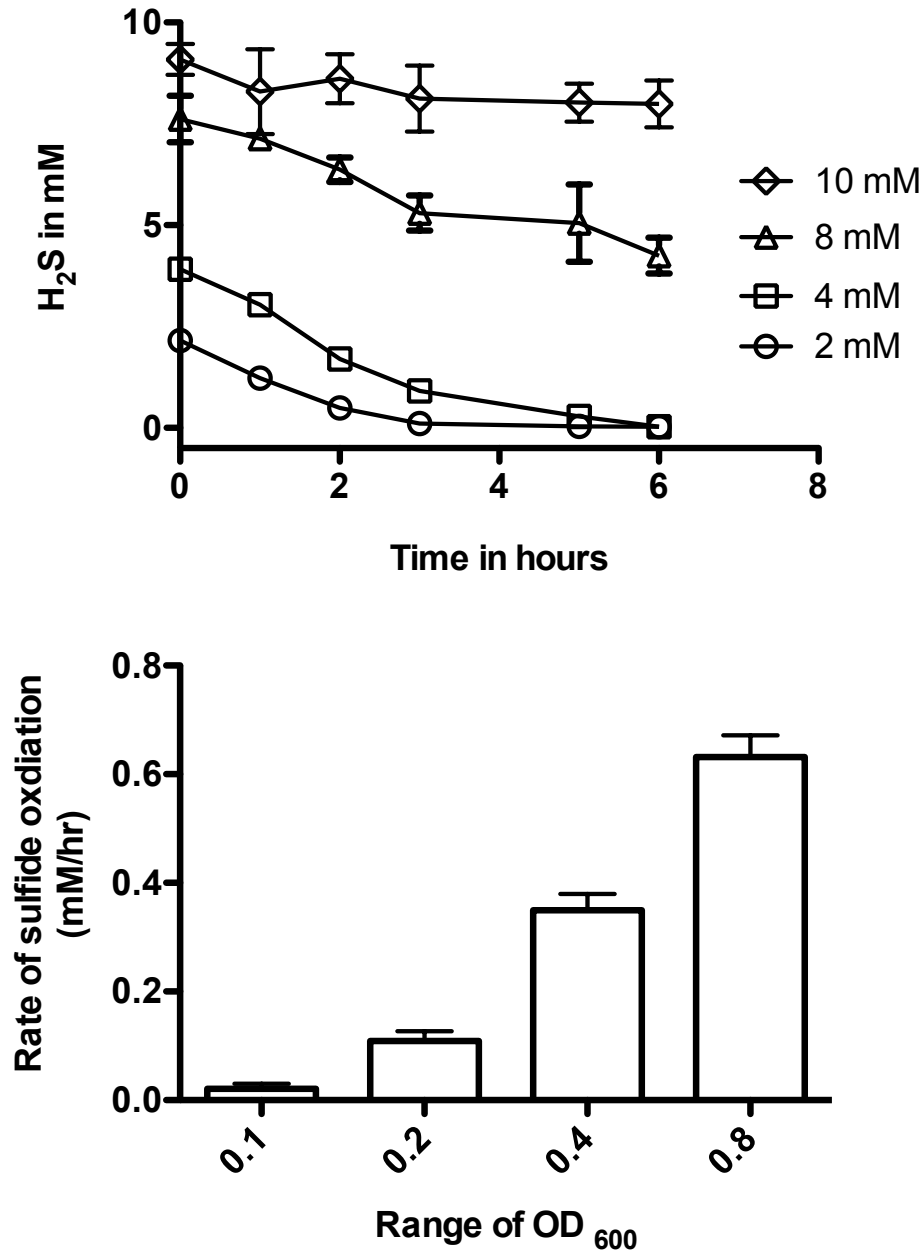

**Figure S2 H<sub>2</sub>S oxidation is directly proportional to cell density.** The rate of H<sub>2</sub>S oxidation is dependent on the concentration of H<sub>2</sub>S and cell OD, faster rates are observed for lower concentrations of H<sub>2</sub>S with high cell OD.
