# Supplementary material for: Mechanism of H2S Oxidation by the Dissimilatory Perchlorate-Reducing Microorganism Azospira suillum PS
Source: PubMed Central journal article supplement (PMC5358917; doi:10.1128/mbio.02023-16), 2017-02-21
Supplement: mbo001173198sf3.pdf [file mbo001173198sf3.pdf]

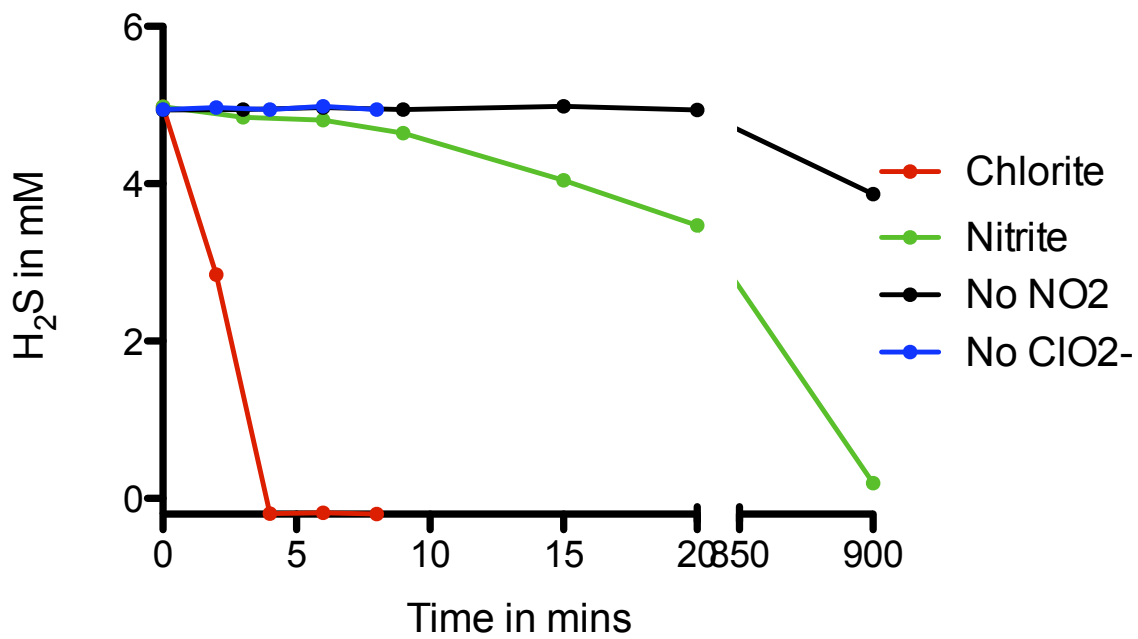

**SI Figure 3.** Abiotic H<sub>2</sub>S oxidation with chlorite and nitrite in comparison to controls.
