# Supplementary material for: Mechanism of H2S Oxidation by the Dissimilatory Perchlorate-Reducing Microorganism Azospira suillum PS
Source: PubMed Central journal article supplement (PMC5358917; doi:10.1128/mbio.02023-16), 2017-02-21
Supplement: mbo001173198sf4.pdf [file mbo001173198sf4.pdf]

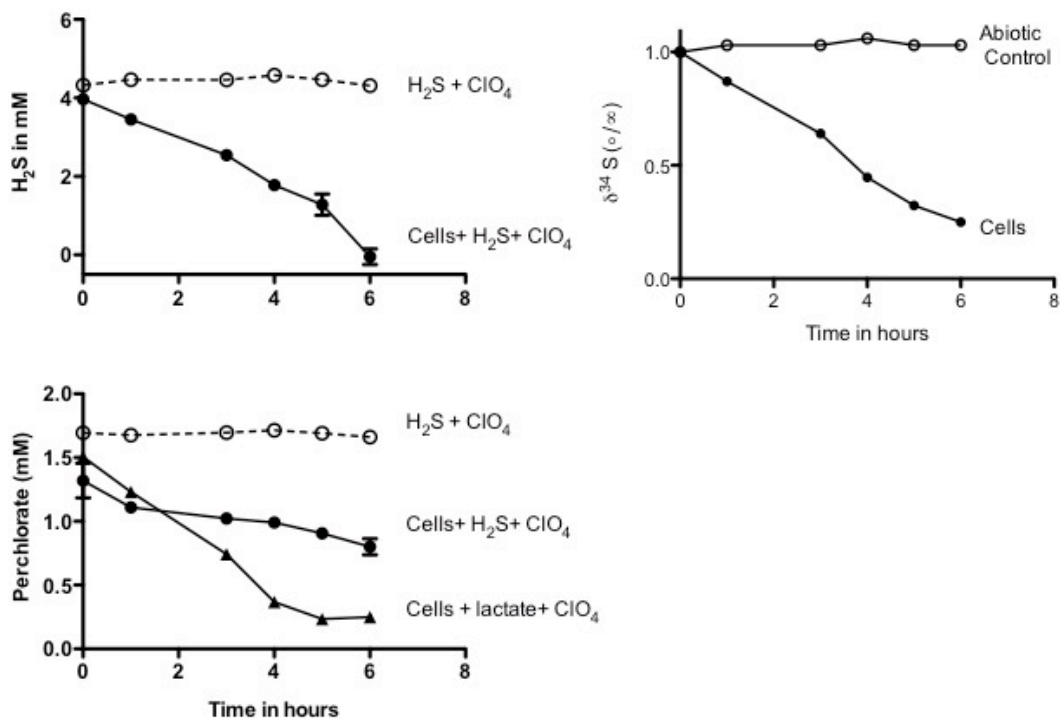

**Figure S4 Isotopic fraction analysis of H<sub>2</sub>S oxidation by PS.** Stable isotope analysis profiles of  $\delta^{34}\text{S}$  for HS<sup>-</sup> and S<sup>0</sup> during H<sub>2</sub>S oxidation by PS. The rate of H<sub>2</sub>S oxidation with the rate of perchlorate reduction is also shown for each of the data points for stable isotope analysis.
